# Supplementary material
Source: publisher figshare collection journal article supplement (https://acs.figshare.com/ndownloader/files/4092010)
Supplement: Supplementary file 1 [file 4092010]

 
data_peterjurd_repro 
 
_audit_creation_method            SHELXL-97 
_chemical_name_systematic 
; 
 ? 
; 
_chemical_name_common             ? 
_chemical_melting_point           ? 
_chemical_formula_moiety          '2(C13 H36 O2 P4 Ru), O'
_chemical_formula_sum 
 'C13 H36 O2.50 P4 Ru' 
_chemical_formula_weight          457.37 
 
loop_ 
 _atom_type_symbol 
 _atom_type_description 
 _atom_type_scat_dispersion_real 
 _atom_type_scat_dispersion_imag 
 _atom_type_scat_source 
 'C'  'C'   0.0033   0.0016 
 'International Tables Vol C Tables 4.2.6.8 and 6.1.1.4' 
 'H'  'H'   0.0000   0.0000 
 'International Tables Vol C Tables 4.2.6.8 and 6.1.1.4' 
 'O'  'O'   0.0106   0.0060 
 'International Tables Vol C Tables 4.2.6.8 and 6.1.1.4' 
 'P'  'P'   0.1023   0.0942 
 'International Tables Vol C Tables 4.2.6.8 and 6.1.1.4' 
 'Ru'  'Ru'  -1.2594   0.8363 
 'International Tables Vol C Tables 4.2.6.8 and 6.1.1.4' 
 
_symmetry_cell_setting            'Monoclinic'
_symmetry_space_group_name_H-M    'P 21/c'
_symmetry_space_group_name_Hall   '-P 2ybc' 
 
loop_ 
 _symmetry_equiv_pos_as_xyz 
 'x, y, z' 
 '-x, y+1/2, -z+1/2' 
 '-x, -y, -z' 
 'x, -y-1/2, z-1/2' 
 
_cell_length_a                    12.288(3) 
_cell_length_b                    9.911(2) 
_cell_length_c                    17.615(4) 
_cell_angle_alpha                 90.00 
_cell_angle_beta                  92.71(3) 
_cell_angle_gamma                 90.00 
_cell_volume                      2142.9(7) 
_cell_formula_units_Z             4 
_cell_measurement_temperature      100(2) 
_cell_measurement_reflns_used     9980
_cell_measurement_theta_min       2.5
_cell_measurement_theta_max       22.5 
 
_exptl_crystal_description        'Thin plates'
_exptl_crystal_colour             'light yellow' 
_exptl_crystal_size_max           0.02 
_exptl_crystal_size_mid           0.02 
_exptl_crystal_size_min           0.01 
_exptl_crystal_density_meas       ? 
_exptl_crystal_density_diffrn     1.418 
_exptl_crystal_density_method     'not measured' 
_exptl_crystal_F_000              952 
_exptl_absorpt_coefficient_mu     1.033 
_exptl_absorpt_correction_type    none 
_exptl_absorpt_correction_T_min   ?
_exptl_absorpt_correction_T_max   ?
_exptl_absorpt_process_details    ? 
 
_exptl_special_details 
; 
 ? 
; 
 
_diffrn_ambient_temperature       100(2) 
_diffrn_radiation_wavelength      0.71073 
_diffrn_radiation_type            'Synchrotron'
_diffrn_radiation_source          'Synchrotron BM'  
_diffrn_radiation_monochromator   Si<111>
_diffrn_measurement_device_type   '3-BM1 Australian Synchrotron' 
_diffrn_measurement_method        '\f scans'
_diffrn_detector_area_resol_mean 'ADSC Q210'
_diffrn_standards_number          0 
_diffrn_standards_interval_count  0 
_diffrn_standards_interval_time   0 
_diffrn_standards_decay_%         0 
_diffrn_reflns_number             22907 
_diffrn_reflns_av_R_equivalents   0.0256 
_diffrn_reflns_av_sigmaI/netI     0.0155 
_diffrn_reflns_limit_h_min        -13 
_diffrn_reflns_limit_h_max        13 
_diffrn_reflns_limit_k_min        -11 
_diffrn_reflns_limit_k_max        11 
_diffrn_reflns_limit_l_min        -20 
_diffrn_reflns_limit_l_max        20 
_diffrn_reflns_theta_min          1.66 
_diffrn_reflns_theta_max          23.86 
_reflns_number_total              3265 
_reflns_number_gt                 3109 
_reflns_threshold_expression      >2sigma(I) 
 
_computing_data_collection        'BLU-ICE (McPhillips et al, 2002)' 
_computing_cell_refinement        'XDS (Kabsch, 1993)'
_computing_data_reduction         'XDS (Kabsch, 1993)'
_computing_structure_solution     'SHELXS-97 (Sheldrick, 2008)' 
_computing_structure_refinement   'SHELXL-97 (Sheldrick, 2008)' 
_computing_molecular_graphics     
;ORTEP-3 (Farrugia, 1997)
WINGX-32 (Farrugia, 1999) 
; 
 
_refine_special_details 
; 
 Refinement of F^2^ against ALL reflections.  The weighted R-factor wR and 
 goodness of fit S are based on F^2^, conventional R-factors R are based 
 on F, with F set to zero for negative F^2^. The threshold expression of 
 F^2^ > 2sigma(F^2^) is used only for calculating R-factors(gt) etc. and is 
 not relevant to the choice of reflections for refinement.  R-factors based 
 on F^2^ are statistically about twice as large as those based on F, and R- 
 factors based on ALL data will be even larger.

 The microcrystals (~ 10 microns in one dimension) in the synchrotron beam
 afforded the crystal structure determination, but the one circle goniometer
 geometry and the absence of abosorption correction resulted in ripples 
 around   heavy atom (Ru). The isolated peak was assigned as a water 
 molecule with  half occupancy assigned (H-atoms have not been located on 
 this), but O1W  makes O-H...O contacts (2.87 A) with the carbonyl oxygen 
 O1 from the bound  ligand.  
 
; 
 
_refine_ls_structure_factor_coef  Fsqd  
_refine_ls_matrix_type            full 
_refine_ls_weighting_scheme       calc  
_refine_ls_weighting_details 
 'calc w=1/[\s^2^(Fo^2^)+(0.0308P)^2^+9.6983P] where P=(Fo^2^+2Fc^2^)/3' 
_atom_sites_solution_primary      direct 
_atom_sites_solution_secondary    difmap 
_atom_sites_solution_hydrogens    geom 
_refine_ls_hydrogen_treatment     mixed 
_refine_ls_extinction_method      none 
_refine_ls_extinction_coef        ? 
_refine_ls_number_reflns          3265 
_refine_ls_number_parameters      205 
_refine_ls_number_restraints      0 
_refine_ls_R_factor_all           0.0426 
_refine_ls_R_factor_gt            0.0405 
_refine_ls_wR_factor_ref          0.0958 
_refine_ls_wR_factor_gt           0.0949 
_refine_ls_goodness_of_fit_ref    1.147 
_refine_ls_restrained_S_all       1.147 
_refine_ls_shift/su_max           0.000 
_refine_ls_shift/su_mean          0.000 
 
loop_ 
 _atom_site_label 
 _atom_site_type_symbol 
 _atom_site_fract_x 
 _atom_site_fract_y 
 _atom_site_fract_z 
 _atom_site_U_iso_or_equiv 
 _atom_site_adp_type 
 _atom_site_occupancy 
 _atom_site_symmetry_multiplicity 
 _atom_site_calc_flag 
 _atom_site_refinement_flags 
 _atom_site_disorder_assembly 
 _atom_site_disorder_group 
Ru1 Ru 0.74177(3) 0.25667(4) 0.353507(19) 0.02033(13) Uani 1 1 d . . . 
H1RU H 0.596(4) 0.224(5) 0.351(3) 0.040(15) Uiso 1 1 d . . . 
P1 P 0.67484(11) 0.43973(14) 0.28499(7) 0.0315(3) Uani 1 1 d . . . 
P2 P 0.92808(10) 0.30326(13) 0.34105(7) 0.0245(3) Uani 1 1 d . . . 
P3 P 0.73090(10) 0.35205(12) 0.46875(6) 0.0245(3) Uani 1 1 d . . . 
P4 P 0.74002(10) 0.03799(12) 0.39637(6) 0.0263(3) Uani 1 1 d . . . 
O1 O 0.7430(3) -0.0430(4) 0.18022(18) 0.0390(9) Uani 1 1 d . . . 
O2 O 0.7508(3) 0.1483(3) 0.24503(17) 0.0258(7) Uani 1 1 d . . . 
C1 C 0.5524(5) 0.5217(7) 0.3168(3) 0.0555(18) Uani 1 1 d . . . 
H13 H 0.5259 0.5845 0.2788 0.083 Uiso 1 1 calc R . . 
H11 H 0.5693 0.5689 0.3635 0.083 Uiso 1 1 calc R . . 
H12 H 0.4976 0.4549 0.3249 0.083 Uiso 1 1 calc R . . 
C2 C 0.6322(5) 0.3925(6) 0.1885(3) 0.0425(14) Uani 1 1 d . . . 
H22 H 0.6015 0.4696 0.1623 0.064 Uiso 1 1 calc R . . 
H21 H 0.5785 0.3222 0.1897 0.064 Uiso 1 1 calc R . . 
H23 H 0.6940 0.3607 0.1623 0.064 Uiso 1 1 calc R . . 
C3 C 0.7570(6) 0.5890(6) 0.2672(4) 0.0546(17) Uani 1 1 d . . . 
H32 H 0.8251 0.5618 0.2474 0.082 Uiso 1 1 calc R . . 
H33 H 0.7706 0.6374 0.3139 0.082 Uiso 1 1 calc R . . 
H31 H 0.7186 0.6462 0.2311 0.082 Uiso 1 1 calc R . . 
C4 C 0.9685(4) 0.3050(6) 0.2422(3) 0.0331(12) Uani 1 1 d . . . 
H42 H 0.9290 0.3745 0.2147 0.050 Uiso 1 1 calc R . . 
H41 H 0.9524 0.2191 0.2191 0.050 Uiso 1 1 calc R . . 
H43 H 1.0453 0.3224 0.2410 0.050 Uiso 1 1 calc R . . 
C5 C 0.9890(4) 0.4609(6) 0.3762(3) 0.0402(13) Uani 1 1 d . . . 
H52 H 1.0624 0.4674 0.3600 0.060 Uiso 1 1 calc R . . 
H53 H 0.9895 0.4622 0.4307 0.060 Uiso 1 1 calc R . . 
H51 H 0.9472 0.5358 0.3562 0.060 Uiso 1 1 calc R . . 
C6 C 1.0327(4) 0.1892(6) 0.3810(3) 0.0429(14) Uani 1 1 d . . . 
H61 H 1.1035 0.2237 0.3707 0.064 Uiso 1 1 calc R . . 
H63 H 1.0236 0.1015 0.3584 0.064 Uiso 1 1 calc R . . 
H62 H 1.0261 0.1824 0.4350 0.064 Uiso 1 1 calc R . . 
C7 C 0.7544(5) 0.5327(5) 0.4832(3) 0.0361(12) Uani 1 1 d . . . 
H71 H 0.7021 0.5831 0.4525 0.054 Uiso 1 1 calc R . . 
H72 H 0.8266 0.5553 0.4689 0.054 Uiso 1 1 calc R . . 
H73 H 0.7468 0.5546 0.5358 0.054 Uiso 1 1 calc R . . 
C8 C 0.8240(4) 0.2858(5) 0.5436(3) 0.0287(11) Uani 1 1 d . . . 
H82 H 0.8103 0.3297 0.5908 0.043 Uiso 1 1 calc R . . 
H81 H 0.8978 0.3025 0.5307 0.043 Uiso 1 1 calc R . . 
H83 H 0.8127 0.1904 0.5487 0.043 Uiso 1 1 calc R . . 
C9 C 0.6012(4) 0.3376(6) 0.5146(3) 0.0353(12) Uani 1 1 d . . . 
H92 H 0.5832 0.2440 0.5206 0.053 Uiso 1 1 calc R . . 
H93 H 0.5450 0.3812 0.4838 0.053 Uiso 1 1 calc R . . 
H91 H 0.6071 0.3800 0.5637 0.053 Uiso 1 1 calc R . . 
C10 C 0.6926(5) -0.0481(5) 0.3093(3) 0.0371(13) Uani 1 1 d . . . 
H102 H 0.7185 -0.1406 0.3105 0.044 Uiso 1 1 calc R . . 
H101 H 0.6136 -0.0501 0.3064 0.044 Uiso 1 1 calc R . . 
C11 C 0.7331(4) 0.0224(5) 0.2396(3) 0.0274(10) Uani 1 1 d . . . 
C12 C 0.8565(5) -0.0648(6) 0.4280(3) 0.0453(14) Uani 1 1 d . . . 
H122 H 0.8907 -0.0258 0.4729 0.068 Uiso 1 1 calc R . . 
H121 H 0.9079 -0.0683 0.3886 0.068 Uiso 1 1 calc R . . 
H123 H 0.8323 -0.1545 0.4390 0.068 Uiso 1 1 calc R . . 
C13 C 0.6427(5) -0.0170(6) 0.4644(3) 0.0435(14) Uani 1 1 d . . . 
H132 H 0.6352 -0.1133 0.4620 0.065 Uiso 1 1 calc R . . 
H133 H 0.5733 0.0244 0.4525 0.065 Uiso 1 1 calc R . . 
H131 H 0.6680 0.0090 0.5147 0.065 Uiso 1 1 calc R . . 
O1W O 0.6119(8) 0.7360(10) 0.1228(6) 0.070(3) Uani 0.50 1 d P . . 
 
loop_ 
 _atom_site_aniso_label 
 _atom_site_aniso_U_11 
 _atom_site_aniso_U_22 
 _atom_site_aniso_U_33 
 _atom_site_aniso_U_23 
 _atom_site_aniso_U_13 
 _atom_site_aniso_U_12 
Ru1 0.0247(2) 0.0218(2) 0.0153(2) -0.00219(14) 0.00909(14) -0.00262(15) 
P1 0.0416(8) 0.0345(7) 0.0192(6) -0.0009(5) 0.0085(5) 0.0134(6) 
P2 0.0247(6) 0.0301(7) 0.0192(6) -0.0041(5) 0.0082(5) -0.0045(5) 
P3 0.0310(6) 0.0270(6) 0.0162(6) -0.0027(5) 0.0103(5) -0.0004(5) 
P4 0.0358(7) 0.0248(6) 0.0187(6) 0.0001(5) 0.0064(5) -0.0058(5) 
O1 0.061(2) 0.034(2) 0.0236(18) -0.0117(15) 0.0152(17) -0.0111(18) 
O2 0.0314(17) 0.0279(18) 0.0189(16) -0.0018(13) 0.0088(13) -0.0040(14) 
C1 0.060(4) 0.080(5) 0.027(3) -0.006(3) 0.004(3) 0.039(4) 
C2 0.056(4) 0.052(3) 0.019(3) -0.001(2) 0.006(2) 0.024(3) 
C3 0.086(5) 0.030(3) 0.049(4) 0.006(3) 0.015(3) 0.011(3) 
C4 0.031(3) 0.044(3) 0.025(3) -0.005(2) 0.012(2) -0.007(2) 
C5 0.044(3) 0.048(3) 0.030(3) -0.010(2) 0.012(2) -0.021(3) 
C6 0.031(3) 0.059(4) 0.040(3) 0.003(3) 0.009(2) 0.006(3) 
C7 0.059(3) 0.031(3) 0.019(2) -0.007(2) 0.012(2) 0.000(2) 
C8 0.034(3) 0.032(3) 0.021(2) -0.007(2) 0.006(2) -0.003(2) 
C9 0.036(3) 0.047(3) 0.024(3) -0.001(2) 0.016(2) 0.006(2) 
C10 0.058(3) 0.030(3) 0.023(3) -0.004(2) 0.007(2) -0.014(2) 
C11 0.030(2) 0.031(3) 0.022(2) -0.004(2) 0.0045(19) -0.005(2) 
C12 0.060(4) 0.037(3) 0.039(3) 0.011(2) 0.001(3) 0.006(3) 
C13 0.064(4) 0.040(3) 0.028(3) -0.001(2) 0.021(3) -0.021(3) 
O1W 0.071(6) 0.055(6) 0.085(7) -0.006(5) -0.002(5) 0.002(5) 
 
_geom_special_details 
; 
 All esds (except the esd in the dihedral angle between two l.s. planes) 
 are estimated using the full covariance matrix.  The cell esds are taken 
 into account individually in the estimation of esds in distances, angles 
 and torsion angles; correlations between esds in cell parameters are only 
 used when they are defined by crystal symmetry.  An approximate (isotropic) 
 treatment of cell esds is used for estimating esds involving l.s. planes. 
; 
 
loop_ 
 _geom_bond_atom_site_label_1 
 _geom_bond_atom_site_label_2 
 _geom_bond_distance 
 _geom_bond_site_symmetry_2 
 _geom_bond_publ_flag 
Ru1 O2 2.200(3) . ? 
Ru1 P3 2.2490(12) . ? 
Ru1 P4 2.2955(13) . ? 
Ru1 P1 2.3089(14) . ? 
Ru1 P2 2.3560(13) . ? 
Ru1 H1RU 1.82(5) . ? 
P1 C2 1.817(5) . ? 
P1 C1 1.821(5) . ? 
P1 C3 1.827(6) . ? 
P2 C5 1.827(5) . ? 
P2 C6 1.828(6) . ? 
P2 C4 1.834(5) . ? 
P3 C9 1.827(5) . ? 
P3 C8 1.826(5) . ? 
P3 C7 1.830(5) . ? 
P4 C13 1.817(5) . ? 
P4 C12 1.822(6) . ? 
P4 C10 1.826(5) . ? 
O1 C11 1.242(6) . ? 
O2 C11 1.269(6) . ? 
C1 H13 0.9600 . ? 
C1 H11 0.9600 . ? 
C1 H12 0.9600 . ? 
C2 H22 0.9600 . ? 
C2 H21 0.9600 . ? 
C2 H23 0.9600 . ? 
C3 H32 0.9600 . ? 
C3 H33 0.9600 . ? 
C3 H31 0.9600 . ? 
C4 H42 0.9600 . ? 
C4 H41 0.9600 . ? 
C4 H43 0.9600 . ? 
C5 H52 0.9600 . ? 
C5 H53 0.9600 . ? 
C5 H51 0.9600 . ? 
C6 H61 0.9600 . ? 
C6 H63 0.9600 . ? 
C6 H62 0.9600 . ? 
C7 H71 0.9600 . ? 
C7 H72 0.9600 . ? 
C7 H73 0.9600 . ? 
C8 H82 0.9600 . ? 
C8 H81 0.9600 . ? 
C8 H83 0.9600 . ? 
C9 H92 0.9600 . ? 
C9 H93 0.9600 . ? 
C9 H91 0.9600 . ? 
C10 C11 1.517(7) . ? 
C10 H102 0.9700 . ? 
C10 H101 0.9700 . ? 
C12 H122 0.9600 . ? 
C12 H121 0.9600 . ? 
C12 H123 0.9600 . ? 
C13 H132 0.9600 . ? 
C13 H133 0.9600 . ? 
C13 H131 0.9600 . ? 
 
loop_ 
 _geom_angle_atom_site_label_1 
 _geom_angle_atom_site_label_2 
 _geom_angle_atom_site_label_3 
 _geom_angle 
 _geom_angle_site_symmetry_1 
 _geom_angle_site_symmetry_3 
 _geom_angle_publ_flag 
O2 Ru1 P3 175.60(9) . . ? 
O2 Ru1 P4 79.99(9) . . ? 
P3 Ru1 P4 95.63(4) . . ? 
O2 Ru1 P1 87.76(9) . . ? 
P3 Ru1 P1 96.13(5) . . ? 
P4 Ru1 P1 154.85(5) . . ? 
O2 Ru1 P2 85.74(9) . . ? 
P3 Ru1 P2 95.80(5) . . ? 
P4 Ru1 P2 103.88(5) . . ? 
P1 Ru1 P2 96.95(5) . . ? 
O2 Ru1 H1RU 89.1(17) . . ? 
P3 Ru1 H1RU 89.7(17) . . ? 
P4 Ru1 H1RU 79.4(17) . . ? 
P1 Ru1 H1RU 78.5(17) . . ? 
P2 Ru1 H1RU 173.3(17) . . ? 
C2 P1 C1 101.4(3) . . ? 
C2 P1 C3 100.7(3) . . ? 
C1 P1 C3 99.4(3) . . ? 
C2 P1 Ru1 111.50(19) . . ? 
C1 P1 Ru1 118.0(2) . . ? 
C3 P1 Ru1 122.7(2) . . ? 
C5 P2 C6 97.4(3) . . ? 
C5 P2 C4 100.8(2) . . ? 
C6 P2 C4 98.9(2) . . ? 
C5 P2 Ru1 121.36(18) . . ? 
C6 P2 Ru1 120.80(19) . . ? 
C4 P2 Ru1 113.48(17) . . ? 
C9 P3 C8 100.5(2) . . ? 
C9 P3 C7 98.6(2) . . ? 
C8 P3 C7 99.3(2) . . ? 
C9 P3 Ru1 117.18(18) . . ? 
C8 P3 Ru1 116.03(16) . . ? 
C7 P3 Ru1 121.42(16) . . ? 
C13 P4 C12 99.4(3) . . ? 
C13 P4 C10 102.7(2) . . ? 
C12 P4 C10 102.1(3) . . ? 
C13 P4 Ru1 121.1(2) . . ? 
C12 P4 Ru1 127.5(2) . . ? 
C10 P4 Ru1 99.94(17) . . ? 
C11 O2 Ru1 122.0(3) . . ? 
P1 C1 H13 109.5 . . ? 
P1 C1 H11 109.5 . . ? 
H13 C1 H11 109.5 . . ? 
P1 C1 H12 109.5 . . ? 
H13 C1 H12 109.5 . . ? 
H11 C1 H12 109.5 . . ? 
P1 C2 H22 109.5 . . ? 
P1 C2 H21 109.5 . . ? 
H22 C2 H21 109.5 . . ? 
P1 C2 H23 109.5 . . ? 
H22 C2 H23 109.5 . . ? 
H21 C2 H23 109.5 . . ? 
P1 C3 H32 109.5 . . ? 
P1 C3 H33 109.5 . . ? 
H32 C3 H33 109.5 . . ? 
P1 C3 H31 109.5 . . ? 
H32 C3 H31 109.5 . . ? 
H33 C3 H31 109.5 . . ? 
P2 C4 H42 109.5 . . ? 
P2 C4 H41 109.5 . . ? 
H42 C4 H41 109.5 . . ? 
P2 C4 H43 109.5 . . ? 
H42 C4 H43 109.5 . . ? 
H41 C4 H43 109.5 . . ? 
P2 C5 H52 109.5 . . ? 
P2 C5 H53 109.5 . . ? 
H52 C5 H53 109.5 . . ? 
P2 C5 H51 109.5 . . ? 
H52 C5 H51 109.5 . . ? 
H53 C5 H51 109.5 . . ? 
P2 C6 H61 109.5 . . ? 
P2 C6 H63 109.5 . . ? 
H61 C6 H63 109.5 . . ? 
P2 C6 H62 109.5 . . ? 
H61 C6 H62 109.5 . . ? 
H63 C6 H62 109.5 . . ? 
P3 C7 H71 109.5 . . ? 
P3 C7 H72 109.5 . . ? 
H71 C7 H72 109.5 . . ? 
P3 C7 H73 109.5 . . ? 
H71 C7 H73 109.5 . . ? 
H72 C7 H73 109.5 . . ? 
P3 C8 H82 109.5 . . ? 
P3 C8 H81 109.5 . . ? 
H82 C8 H81 109.5 . . ? 
P3 C8 H83 109.5 . . ? 
H82 C8 H83 109.5 . . ? 
H81 C8 H83 109.5 . . ? 
P3 C9 H92 109.5 . . ? 
P3 C9 H93 109.5 . . ? 
H92 C9 H93 109.5 . . ? 
P3 C9 H91 109.5 . . ? 
H92 C9 H91 109.5 . . ? 
H93 C9 H91 109.5 . . ? 
C11 C10 P4 111.1(3) . . ? 
C11 C10 H102 109.4 . . ? 
P4 C10 H102 109.4 . . ? 
C11 C10 H101 109.4 . . ? 
P4 C10 H101 109.4 . . ? 
H102 C10 H101 108.0 . . ? 
O1 C11 O2 123.6(4) . . ? 
O1 C11 C10 119.3(4) . . ? 
O2 C11 C10 117.0(4) . . ? 
P4 C12 H122 109.5 . . ? 
P4 C12 H121 109.5 . . ? 
H122 C12 H121 109.5 . . ? 
P4 C12 H123 109.5 . . ? 
H122 C12 H123 109.5 . . ? 
H121 C12 H123 109.5 . . ? 
P4 C13 H132 109.5 . . ? 
P4 C13 H133 109.5 . . ? 
H132 C13 H133 109.5 . . ? 
P4 C13 H131 109.5 . . ? 
H132 C13 H131 109.5 . . ? 
H133 C13 H131 109.5 . . ? 
 
loop_ 
 _geom_torsion_atom_site_label_1 
 _geom_torsion_atom_site_label_2 
 _geom_torsion_atom_site_label_3 
 _geom_torsion_atom_site_label_4 
 _geom_torsion 
 _geom_torsion_site_symmetry_1 
 _geom_torsion_site_symmetry_2 
 _geom_torsion_site_symmetry_3 
 _geom_torsion_site_symmetry_4 
 _geom_torsion_publ_flag 
O2 Ru1 P1 C2 14.4(2) . . . . ? 
P3 Ru1 P1 C2 -163.5(2) . . . . ? 
P4 Ru1 P1 C2 -46.1(2) . . . . ? 
P2 Ru1 P1 C2 99.8(2) . . . . ? 
O2 Ru1 P1 C1 131.1(3) . . . . ? 
P3 Ru1 P1 C1 -46.9(3) . . . . ? 
P4 Ru1 P1 C1 70.6(3) . . . . ? 
P2 Ru1 P1 C1 -143.5(3) . . . . ? 
O2 Ru1 P1 C3 -105.0(3) . . . . ? 
P3 Ru1 P1 C3 77.1(2) . . . . ? 
P4 Ru1 P1 C3 -165.5(2) . . . . ? 
P2 Ru1 P1 C3 -19.5(2) . . . . ? 
O2 Ru1 P2 C5 146.9(2) . . . . ? 
P3 Ru1 P2 C5 -37.2(2) . . . . ? 
P4 Ru1 P2 C5 -134.5(2) . . . . ? 
P1 Ru1 P2 C5 59.7(2) . . . . ? 
O2 Ru1 P2 C6 -90.5(2) . . . . ? 
P3 Ru1 P2 C6 85.4(2) . . . . ? 
P4 Ru1 P2 C6 -11.9(2) . . . . ? 
P1 Ru1 P2 C6 -177.7(2) . . . . ? 
O2 Ru1 P2 C4 26.6(2) . . . . ? 
P3 Ru1 P2 C4 -157.6(2) . . . . ? 
P4 Ru1 P2 C4 105.2(2) . . . . ? 
P1 Ru1 P2 C4 -60.6(2) . . . . ? 
O2 Ru1 P3 C9 -65.4(12) . . . . ? 
P4 Ru1 P3 C9 -71.1(2) . . . . ? 
P1 Ru1 P3 C9 86.6(2) . . . . ? 
P2 Ru1 P3 C9 -175.8(2) . . . . ? 
O2 Ru1 P3 C8 53.2(12) . . . . ? 
P4 Ru1 P3 C8 47.45(18) . . . . ? 
P1 Ru1 P3 C8 -154.82(18) . . . . ? 
P2 Ru1 P3 C8 -57.16(18) . . . . ? 
O2 Ru1 P3 C7 173.8(12) . . . . ? 
P4 Ru1 P3 C7 168.1(2) . . . . ? 
P1 Ru1 P3 C7 -34.2(2) . . . . ? 
P2 Ru1 P3 C7 63.5(2) . . . . ? 
O2 Ru1 P4 C13 -133.3(2) . . . . ? 
P3 Ru1 P4 C13 46.2(2) . . . . ? 
P1 Ru1 P4 C13 -71.3(3) . . . . ? 
P2 Ru1 P4 C13 143.7(2) . . . . ? 
O2 Ru1 P4 C12 92.0(3) . . . . ? 
P3 Ru1 P4 C12 -88.5(2) . . . . ? 
P1 Ru1 P4 C12 154.0(2) . . . . ? 
P2 Ru1 P4 C12 8.9(2) . . . . ? 
O2 Ru1 P4 C10 -21.8(2) . . . . ? 
P3 Ru1 P4 C10 157.75(19) . . . . ? 
P1 Ru1 P4 C10 40.2(2) . . . . ? 
P2 Ru1 P4 C10 -104.8(2) . . . . ? 
P3 Ru1 O2 C11 6.7(14) . . . . ? 
P4 Ru1 O2 C11 12.4(3) . . . . ? 
P1 Ru1 O2 C11 -145.5(3) . . . . ? 
P2 Ru1 O2 C11 117.4(3) . . . . ? 
C13 P4 C10 C11 158.1(4) . . . . ? 
C12 P4 C10 C11 -99.2(4) . . . . ? 
Ru1 P4 C10 C11 32.8(4) . . . . ? 
Ru1 O2 C11 O1 -176.2(4) . . . . ? 
Ru1 O2 C11 C10 6.8(6) . . . . ? 
P4 C10 C11 O1 154.7(4) . . . . ? 
P4 C10 C11 O2 -28.2(6) . . . . ? 
 
_diffrn_measured_fraction_theta_max    0.988 
_diffrn_reflns_theta_full              23.86 
_diffrn_measured_fraction_theta_full   0.988 
_refine_diff_density_max    1.908 
_refine_diff_density_min   -0.980 
_refine_diff_density_rms    0.092 
_iucr_refine_instructions_details
;
TITL peterjurd repro in P2(1)/c
CELL 0.71073  12.2880   9.9110  17.6150  90.000  92.708  90.000
ZERR    4.00   0.0025   0.0020   0.0035   0.000   0.030   0.000
LATT 1
SYMM -X, 0.5+Y, 0.5-Z
SFAC C  H  O  P  Ru
UNIT 52  144  10  16  4
OMIT -3 50
L.S. 15
ACTA
BOND $H
FMAP 2
PLAN 20
SIZE 0.02 0.015 0.01
CONF
WGHT    0.030800    9.698301
FVAR       0.44270
MOLE 1
RU1   5    0.741766    0.256670    0.353507    11.00000    0.02466    0.02182 =
         0.01528   -0.00219    0.00909   -0.00262
H1RU  2    0.595703    0.224118    0.351210    11.00000    0.03965
P1    4    0.674843    0.439731    0.284987    11.00000    0.04155    0.03454 =
         0.01918   -0.00094    0.00845    0.01341
P2    4    0.928085    0.303257    0.341048    11.00000    0.02472    0.03014 =
         0.01918   -0.00412    0.00825   -0.00455
P3    4    0.730902    0.352047    0.468751    11.00000    0.03104    0.02699 =
         0.01621   -0.00268    0.01028   -0.00037
P4    4    0.740017    0.037988    0.396367    11.00000    0.03581    0.02481 =
         0.01867    0.00015    0.00636   -0.00582
O1    3    0.742975   -0.043004    0.180216    11.00000    0.06085    0.03367 =
         0.02358   -0.01173    0.01516   -0.01107
O2    3    0.750785    0.148268    0.245026    11.00000    0.03136    0.02791 =
         0.01893   -0.00185    0.00882   -0.00400
C1    1    0.552445    0.521704    0.316787    11.00000    0.06027    0.07974 =
         0.02683   -0.00598    0.00413    0.03916
AFIX 137
H13   2    0.525901    0.584541    0.278789    11.00000   -1.50000
H11   2    0.569270    0.568909    0.363464    11.00000   -1.50000
H12   2    0.497633    0.454882    0.324873    11.00000   -1.50000
AFIX   0
C2    1    0.632166    0.392477    0.188465    11.00000    0.05638    0.05244 =
         0.01924   -0.00100    0.00636    0.02372
AFIX 137
H22   2    0.601453    0.469552    0.162322    11.00000   -1.50000
H21   2    0.578494    0.322229    0.189738    11.00000   -1.50000
H23   2    0.694002    0.360680    0.162333    11.00000   -1.50000
AFIX   0
C3    1    0.757037    0.589013    0.267245    11.00000    0.08583    0.03043 =
         0.04874    0.00596    0.01520    0.01058
AFIX 137
H32   2    0.825093    0.561847    0.247406    11.00000   -1.50000
H33   2    0.770582    0.637448    0.313934    11.00000   -1.50000
H31   2    0.718631    0.646201    0.231070    11.00000   -1.50000
AFIX   0
C4    1    0.968505    0.305025    0.242181    11.00000    0.03097    0.04406 =
         0.02539   -0.00535    0.01175   -0.00696
AFIX 137
H42   2    0.929041    0.374473    0.214667    11.00000   -1.50000
H41   2    0.952381    0.219101    0.219140    11.00000   -1.50000
H43   2    1.045258    0.322427    0.240970    11.00000   -1.50000
AFIX   0
C5    1    0.989018    0.460867    0.376158    11.00000    0.04371    0.04787 =
         0.02990   -0.01045    0.01236   -0.02088
AFIX 137
H52   2    1.062378    0.467434    0.360043    11.00000   -1.50000
H53   2    0.989498    0.462203    0.430666    11.00000   -1.50000
H51   2    0.947189    0.535762    0.356208    11.00000   -1.50000
AFIX   0
C6    1    1.032747    0.189203    0.381029    11.00000    0.03070    0.05898 =
         0.03981    0.00340    0.00901    0.00606
AFIX 137
H61   2    1.103511    0.223735    0.370663    11.00000   -1.50000
H63   2    1.023586    0.101542    0.358441    11.00000   -1.50000
H62   2    1.026104    0.182442    0.434979    11.00000   -1.50000
AFIX   0
C7    1    0.754362    0.532726    0.483210    11.00000    0.05919    0.03082 =
         0.01932   -0.00734    0.01238    0.00040
AFIX 137
H71   2    0.702072    0.583066    0.452498    11.00000   -1.50000
H72   2    0.826561    0.555324    0.468931    11.00000   -1.50000
H73   2    0.746763    0.554589    0.535787    11.00000   -1.50000
AFIX   0
C8    1    0.823963    0.285814    0.543613    11.00000    0.03447    0.03162 =
         0.02062   -0.00654    0.00626   -0.00318
AFIX 137
H82   2    0.810282    0.329666    0.590812    11.00000   -1.50000
H81   2    0.897787    0.302514    0.530694    11.00000   -1.50000
H83   2    0.812740    0.190443    0.548686    11.00000   -1.50000
AFIX   0
C9    1    0.601171    0.337613    0.514644    11.00000    0.03587    0.04728 =
         0.02418   -0.00120    0.01583    0.00637
AFIX 137
H92   2    0.583228    0.244045    0.520553    11.00000   -1.50000
H93   2    0.545034    0.381193    0.483831    11.00000   -1.50000
H91   2    0.607075    0.380016    0.563665    11.00000   -1.50000
AFIX   0
C10   1    0.692607   -0.048123    0.309322    11.00000    0.05796    0.03030 =
         0.02343   -0.00351    0.00696   -0.01360
AFIX  23
H102  2    0.718548   -0.140569    0.310478    11.00000   -1.20000
H101  2    0.613597   -0.050076    0.306423    11.00000   -1.20000
AFIX   0
C11   1    0.733108    0.022441    0.239624    11.00000    0.03000    0.03050 =
         0.02203   -0.00433    0.00449   -0.00515
C12   1    0.856493   -0.064790    0.427956    11.00000    0.06041    0.03677 =
         0.03853    0.01101    0.00074    0.00625
AFIX 137
H122  2    0.890659   -0.025776    0.472917    11.00000   -1.50000
H121  2    0.907865   -0.068264    0.388601    11.00000   -1.50000
H123  2    0.832319   -0.154477    0.438992    11.00000   -1.50000
AFIX   0
C13   1    0.642654   -0.016955    0.464408    11.00000    0.06400    0.04017 =
         0.02810   -0.00110    0.02117   -0.02121
AFIX 137
H132  2    0.635192   -0.113297    0.461987    11.00000   -1.50000
H133  2    0.573300    0.024432    0.452503    11.00000   -1.50000
H131  2    0.668015    0.008967    0.514692    11.00000   -1.50000
AFIX   0
MOLE 2
O1W   3    0.611907    0.736038    0.122813    10.50000    0.07090    0.05461 =
         0.08517   -0.00636   -0.00176    0.00169
HKLF 4
 
REM  peterjurd repro in P2(1)/c
REM R1 =  0.0405 for   3109 Fo > 4sig(Fo)  and  0.0426 for all   3265 data
REM    205 parameters refined using      0 restraints
 
END  
     
WGHT      0.0209     10.8385 
REM Highest difference peak  1.908,  deepest hole -0.980,  1-sigma level  0.092
Q1    1   0.8027  0.2298  0.3786  11.00000  0.05    1.91
Q2    1   0.6410  0.3308  0.3226  11.00000  0.05    0.70
Q3    1   0.7943  0.3203  0.4958  11.00000  0.05    0.49
Q4    1   0.8090  0.1186  0.2747  11.00000  0.05    0.41
Q5    1   0.8751  0.1731  0.3617  11.00000  0.05    0.40
Q6    1   0.7999  0.3218  0.4232  11.00000  0.05    0.40
Q7    1   0.5438  0.2273  0.3416  11.00000  0.05    0.39
Q8    1   0.6398  0.1094  0.3779  11.00000  0.05    0.37
Q9    1   0.5185  0.7720  0.1399  11.00000  0.05    0.36
Q10   1   0.6313  0.2172  0.3745  11.00000  0.05    0.35
Q11   1   0.7740  0.3907  0.3703  11.00000  0.05    0.34
Q12   1   0.6751  0.3854  0.3803  11.00000  0.05    0.34
Q13   1   0.7333  0.1678  0.4240  11.00000  0.05    0.32
Q14   1   0.6029  0.8499  0.1391  11.00000  0.05    0.25
Q15   1   0.7133  0.2859  0.4393  11.00000  0.05    0.25
Q16   1   0.5192  0.6456  0.1223  11.00000  0.05    0.24
Q17   1   0.7963  0.1338  0.4913  11.00000  0.05    0.24
Q18   1   0.6991 -0.0287  0.2719  11.00000  0.05    0.23
Q19   1   0.8544  0.1943  0.4389  11.00000  0.05    0.23
Q20   1   0.7414 -0.0644  0.3251  11.00000  0.05    0.23
;

#===END
 
data_peter3n 
 
_audit_creation_method            SHELXL-97 
_chemical_name_systematic 
; 
 ? 
; 
_chemical_name_common             ? 
_chemical_melting_point           ? 
_chemical_formula_moiety          'C14 H36 P4 Ru S4'  
_chemical_formula_sum 
 'C14 H36 P4 Ru S4' 
_chemical_formula_weight          557.62 
 
loop_ 
 _atom_type_symbol 
 _atom_type_description 
 _atom_type_scat_dispersion_real 
 _atom_type_scat_dispersion_imag 
 _atom_type_scat_source 
 'C'  'C'   0.0033   0.0016 
 'International Tables Vol C Tables 4.2.6.8 and 6.1.1.4' 
 'H'  'H'   0.0000   0.0000 
 'International Tables Vol C Tables 4.2.6.8 and 6.1.1.4' 
 'P'  'P'   0.1023   0.0942 
 'International Tables Vol C Tables 4.2.6.8 and 6.1.1.4' 
 'S'  'S'   0.1246   0.1234 
 'International Tables Vol C Tables 4.2.6.8 and 6.1.1.4' 
 'Ru'  'Ru'  -1.2594   0.8363 
 'International Tables Vol C Tables 4.2.6.8 and 6.1.1.4' 
 
_symmetry_cell_setting            'Monoclinic' 
_symmetry_space_group_name_H-M    'P 21/c' 
_symmetry_space_group_name_Hall    '-P 2ybc '
 
loop_ 
 _symmetry_equiv_pos_as_xyz 
 'x, y, z' 
 '-x, y+1/2, -z+1/2' 
 '-x, -y, -z' 
 'x, -y-1/2, z-1/2' 
 
_cell_length_a                    11.744(4) 
_cell_length_b                    8.946(3) 
_cell_length_c                    22.866(8) 
_cell_angle_alpha                 90.00 
_cell_angle_beta                  94.403(18) 
_cell_angle_gamma                 90.00 
_cell_volume                      2395.2(15) 
_cell_formula_units_Z             4 
_cell_measurement_temperature     150(2) 
_cell_measurement_reflns_used     2729 
_cell_measurement_theta_min       2.386 
_cell_measurement_theta_max       26.097 
 
_exptl_crystal_description        'Small plates'
_exptl_crystal_colour             'Yellow orange' 
_exptl_crystal_size_max           0.11 
_exptl_crystal_size_mid           0.05 
_exptl_crystal_size_min           0.04 
_exptl_crystal_density_meas       ? 
_exptl_crystal_density_diffrn     1.546 
_exptl_crystal_density_method     'not measured' 
_exptl_crystal_F_000              1152 
_exptl_absorpt_coefficient_mu     1.268 
_exptl_absorpt_correction_type    Multi-scan
_exptl_absorpt_correction_T_min   0.8752 
_exptl_absorpt_correction_T_max   0.9570 
_exptl_absorpt_process_details    'SADABS (Bruker, 2001)' 
 
_exptl_special_details 
; 
 ? 
; 
 
_diffrn_ambient_temperature       150(2) 
_diffrn_radiation_wavelength      0.71073 
_diffrn_radiation_type            MoK\a 
_diffrn_radiation_source          'fine-focus sealed tube' 
_diffrn_radiation_monochromator   graphite 
_diffrn_measurement_device_type   'Bruker kappa APEXII CCD Diffractometer' 
_diffrn_measurement_method        '\f scans, and \w scans with \k offsets'
_diffrn_detector_area_resol_mean  ? 
_diffrn_reflns_number             21255 
_diffrn_reflns_av_R_equivalents   0.0804 
_diffrn_reflns_av_sigmaI/netI     0.0799 
_diffrn_reflns_limit_h_min        -13 
_diffrn_reflns_limit_h_max        13 
_diffrn_reflns_limit_k_min        -10 
_diffrn_reflns_limit_k_max        10 
_diffrn_reflns_limit_l_min        -27 
_diffrn_reflns_limit_l_max        19 
_diffrn_reflns_theta_min          3.04 
_diffrn_reflns_theta_max          25.00 
_reflns_number_total              4149 
_reflns_number_gt                 2989 
_reflns_threshold_expression      >2sigma(I) 
 
_computing_data_collection             '<i>APEX2 </i>(Bruker, 2007)'
_computing_cell_refinement             '<i>APEX2 </i>(Bruker, 2007)'
_computing_data_reduction              '<i>APEX2 </i>(Bruker, 2007)'    
_computing_structure_solution          '<i>SHELXS-97</i> (Sheldrick, 2008)'
_computing_structure_refinement        '<i>SHELXL-97</i> (Sheldrick, 2008)'
_computing_molecular_graphics          '<i>SHELXTL-Plus</i> (Sheldrick, 2008)'
 
_refine_special_details 
; 
 Refinement of F^2^ against ALL reflections.  The weighted R-factor wR and 
 goodness of fit S are based on F^2^, conventional R-factors R are based 
 on F, with F set to zero for negative F^2^. The threshold expression of 
 F^2^ > 2sigma(F^2^) is used only for calculating R-factors(gt) etc. and is 
 not relevant to the choice of reflections for refinement.  R-factors based 
 on F^2^ are statistically about twice as large as those based on F, and R- 
 factors based on ALL data will be even larger. 
; 
 
_refine_ls_structure_factor_coef  Fsqd  
_refine_ls_matrix_type            full 
_refine_ls_weighting_scheme       calc  
_refine_ls_weighting_details 
 'calc w=1/[\s^2^(Fo^2^)+(0.0454P)^2^+9.9059P] where P=(Fo^2^+2Fc^2^)/3' 
_atom_sites_solution_primary      direct 
_atom_sites_solution_secondary    difmap 
_atom_sites_solution_hydrogens    geom 
_refine_ls_hydrogen_treatment     constr 
_refine_ls_extinction_method      none 
_refine_ls_extinction_coef        ? 
_refine_ls_number_reflns          4149 
_refine_ls_number_parameters      219 
_refine_ls_number_restraints      0 
_refine_ls_R_factor_all           0.0861 
_refine_ls_R_factor_gt            0.0527 
_refine_ls_wR_factor_ref          0.1403 
_refine_ls_wR_factor_gt           0.1295 
_refine_ls_goodness_of_fit_ref    1.153 
_refine_ls_restrained_S_all       1.153 
_refine_ls_shift/su_max           0.000 
_refine_ls_shift/su_mean          0.000 
 
loop_ 
 _atom_site_label 
 _atom_site_type_symbol 
 _atom_site_fract_x 
 _atom_site_fract_y 
 _atom_site_fract_z 
 _atom_site_U_iso_or_equiv 
 _atom_site_adp_type 
 _atom_site_occupancy 
 _atom_site_symmetry_multiplicity 
 _atom_site_calc_flag 
 _atom_site_refinement_flags 
 _atom_site_disorder_assembly 
 _atom_site_disorder_group 
Ru1 Ru 0.24504(5) 0.35476(6) 0.13224(3) 0.01840(18) Uani 1 1 d . . . 
P1 P 0.05366(16) 0.3198(2) 0.13358(9) 0.0230(4) Uani 1 1 d . . . 
C1 C 0.0086(7) 0.1392(9) 0.1605(4) 0.041(2) Uani 1 1 d . . . 
H1A H -0.0750 0.1362 0.1596 0.062 Uiso 1 1 calc R . . 
H1C H 0.0411 0.1246 0.2008 0.062 Uiso 1 1 calc R . . 
H1D H 0.0353 0.0596 0.1355 0.062 Uiso 1 1 calc R . . 
C2 C -0.0295(7) 0.3204(10) 0.0630(3) 0.040(2) Uani 1 1 d . . . 
H2A H -0.1084 0.2914 0.0685 0.061 Uiso 1 1 calc R . . 
H2B H 0.0039 0.2494 0.0365 0.061 Uiso 1 1 calc R . . 
H2C H -0.0286 0.4210 0.0460 0.061 Uiso 1 1 calc R . . 
C3 C -0.0371(6) 0.4404(10) 0.1741(4) 0.040(2) Uani 1 1 d . . . 
H3A H -0.0399 0.5403 0.1565 0.060 Uiso 1 1 calc R . . 
H3B H -0.0059 0.4473 0.2150 0.060 Uiso 1 1 calc R . . 
H3C H -0.1143 0.3984 0.1727 0.060 Uiso 1 1 calc R . . 
P2 P 0.23301(16) 0.6083(2) 0.14268(9) 0.0255(5) Uani 1 1 d . . . 
C4 C 0.1365(7) 0.7010(9) 0.0886(4) 0.043(2) Uani 1 1 d . . . 
H4A H 0.1390 0.8091 0.0954 0.065 Uiso 1 1 calc R . . 
H4B H 0.0586 0.6645 0.0919 0.065 Uiso 1 1 calc R . . 
H4C H 0.1598 0.6794 0.0492 0.065 Uiso 1 1 calc R . . 
C5 C 0.1897(8) 0.6980(9) 0.2096(4) 0.046(2) Uani 1 1 d . . . 
H5A H 0.2460 0.6758 0.2423 0.070 Uiso 1 1 calc R . . 
H5B H 0.1148 0.6598 0.2186 0.070 Uiso 1 1 calc R . . 
H5C H 0.1851 0.8064 0.2036 0.070 Uiso 1 1 calc R . . 
C6 C 0.3601(7) 0.7144(9) 0.1338(5) 0.051(3) Uani 1 1 d . . . 
H6A H 0.3854 0.6970 0.0945 0.076 Uiso 1 1 calc R . . 
H6B H 0.4202 0.6831 0.1634 0.076 Uiso 1 1 calc R . . 
H6C H 0.3441 0.8210 0.1387 0.076 Uiso 1 1 calc R . . 
P3 P 0.28456(17) 0.3033(2) 0.23147(9) 0.0281(5) Uani 1 1 d . . . 
C7 C 0.1792(8) 0.3286(12) 0.2850(4) 0.053(3) Uani 1 1 d . . . 
H7A H 0.2106 0.2928 0.3234 0.080 Uiso 1 1 calc R . . 
H7B H 0.1101 0.2717 0.2727 0.080 Uiso 1 1 calc R . . 
H7C H 0.1601 0.4349 0.2877 0.080 Uiso 1 1 calc R . . 
C8 C 0.4023(8) 0.4022(11) 0.2697(4) 0.054(3) Uani 1 1 d . . . 
H8A H 0.4092 0.3720 0.3110 0.082 Uiso 1 1 calc R . . 
H8B H 0.3884 0.5101 0.2670 0.082 Uiso 1 1 calc R . . 
H8C H 0.4733 0.3782 0.2517 0.082 Uiso 1 1 calc R . . 
C9 C 0.3256(9) 0.1135(10) 0.2488(4) 0.053(3) Uani 1 1 d . . . 
H9A H 0.3880 0.0838 0.2252 0.079 Uiso 1 1 calc R . . 
H9B H 0.2600 0.0472 0.2401 0.079 Uiso 1 1 calc R . . 
H9C H 0.3510 0.1062 0.2905 0.079 Uiso 1 1 calc R . . 
P1A P 0.28954(18) 0.2439(2) -0.00117(9) 0.0313(5) Uani 1 1 d . . . 
C1A C 0.2360(6) 0.3929(8) 0.0368(3) 0.0291(18) Uani 1 1 d . . . 
H1A1 H 0.1554 0.4101 0.0223 0.035 Uiso 1 1 calc R . . 
H1A2 H 0.2797 0.4841 0.0287 0.035 Uiso 1 1 calc R . . 
C2A C 0.1804(8) 0.1484(11) -0.0471(4) 0.055(3) Uani 1 1 d . . . 
H2A1 H 0.1238 0.1056 -0.0226 0.082 Uiso 1 1 calc R . . 
H2A2 H 0.2154 0.0683 -0.0688 0.082 Uiso 1 1 calc R . . 
H2A3 H 0.1428 0.2196 -0.0749 0.082 Uiso 1 1 calc R . . 
C3A C 0.3943(9) 0.3013(11) -0.0480(4) 0.058(3) Uani 1 1 d . . . 
H3A1 H 0.3635 0.3820 -0.0736 0.087 Uiso 1 1 calc R . . 
H3A2 H 0.4155 0.2166 -0.0721 0.087 Uiso 1 1 calc R . . 
H3A3 H 0.4619 0.3373 -0.0244 0.087 Uiso 1 1 calc R . . 
C1B C 0.3430(6) 0.0971(8) 0.0478(3) 0.0299(18) Uani 1 1 d . . . 
H1B H 0.3262 0.0021 0.0257 0.036 Uiso 1 1 calc R . . 
S1B S 0.25079(17) 0.0945(2) 0.10637(9) 0.0310(5) Uani 1 1 d . . . 
S2B S 0.49511(18) 0.0927(3) 0.06750(11) 0.0445(6) Uani 1 1 d . . . 
C1C C 0.5346(6) 0.2540(9) 0.1066(4) 0.0331(19) Uani 1 1 d . . . 
S1C S 0.44955(16) 0.3859(2) 0.12834(10) 0.0352(5) Uani 1 1 d . . . 
S2C S 0.67752(19) 0.2594(3) 0.11962(14) 0.0650(8) Uani 1 1 d . . . 
 
loop_ 
 _atom_site_aniso_label 
 _atom_site_aniso_U_11 
 _atom_site_aniso_U_22 
 _atom_site_aniso_U_33 
 _atom_site_aniso_U_23 
 _atom_site_aniso_U_13 
 _atom_site_aniso_U_12 
Ru1 0.0173(3) 0.0144(3) 0.0237(3) -0.0002(2) 0.0029(2) 0.0002(2) 
P1 0.0192(9) 0.0229(11) 0.0272(11) 0.0004(8) 0.0032(8) 0.0000(8) 
C1 0.031(5) 0.036(5) 0.057(6) 0.006(4) 0.013(4) -0.005(4) 
C2 0.026(4) 0.063(6) 0.031(5) 0.003(4) 0.000(4) -0.004(4) 
C3 0.019(4) 0.044(5) 0.058(6) -0.006(4) 0.010(4) -0.002(4) 
P2 0.0222(10) 0.0168(10) 0.0374(13) -0.0017(8) 0.0018(9) 0.0005(8) 
C4 0.047(5) 0.021(4) 0.061(6) 0.002(4) -0.007(5) 0.006(4) 
C5 0.052(6) 0.030(5) 0.058(6) -0.010(4) 0.012(5) 0.005(4) 
C6 0.038(5) 0.017(4) 0.098(8) -0.005(5) 0.010(5) -0.005(4) 
P3 0.0269(11) 0.0266(11) 0.0302(12) -0.0003(9) -0.0024(9) 0.0030(9) 
C7 0.055(6) 0.083(8) 0.023(5) -0.006(5) 0.004(4) 0.017(5) 
C8 0.048(6) 0.067(7) 0.044(6) 0.002(5) -0.026(5) -0.013(5) 
C9 0.070(7) 0.038(6) 0.049(6) 0.007(4) -0.006(5) 0.015(5) 
P1A 0.0307(11) 0.0368(12) 0.0273(12) -0.0008(10) 0.0079(9) 0.0039(9) 
C1A 0.028(4) 0.033(5) 0.027(4) 0.001(3) 0.009(3) 0.006(3) 
C2A 0.054(6) 0.066(7) 0.043(6) -0.020(5) -0.007(5) 0.001(5) 
C3A 0.064(7) 0.055(6) 0.059(7) 0.002(5) 0.034(5) -0.002(5) 
C1B 0.030(4) 0.024(4) 0.036(5) -0.009(3) 0.002(4) 0.002(3) 
S1B 0.0395(12) 0.0168(10) 0.0382(12) -0.0016(8) 0.0127(9) 0.0003(8) 
S2B 0.0295(11) 0.0456(13) 0.0579(16) -0.0188(12) 0.0005(10) 0.0137(10) 
C1C 0.020(4) 0.035(5) 0.045(5) -0.003(4) 0.004(4) 0.005(3) 
S1C 0.0212(10) 0.0259(11) 0.0593(15) -0.0084(10) 0.0082(10) -0.0013(8) 
S2C 0.0185(11) 0.082(2) 0.094(2) -0.0240(17) 0.0033(12) 0.0056(12) 
 
_geom_special_details 
; 
 All esds (except the esd in the dihedral angle between two l.s. planes) 
 are estimated using the full covariance matrix.  The cell esds are taken 
 into account individually in the estimation of esds in distances, angles 
 and torsion angles; correlations between esds in cell parameters are only 
 used when they are defined by crystal symmetry.  An approximate (isotropic) 
 treatment of cell esds is used for estimating esds involving l.s. planes. 
; 
 
loop_ 
 _geom_bond_atom_site_label_1 
 _geom_bond_atom_site_label_2 
 _geom_bond_distance 
 _geom_bond_site_symmetry_2 
 _geom_bond_publ_flag 
Ru1 C1A 2.204(7) . ? 
Ru1 P1 2.272(2) . ? 
Ru1 P2 2.286(2) . ? 
Ru1 P3 2.327(2) . ? 
Ru1 S1B 2.405(2) . ? 
Ru1 S1C 2.426(2) . ? 
P1 C3 1.820(8) . ? 
P1 C2 1.822(8) . ? 
P1 C1 1.822(8) . ? 
C1 H1A 0.9800 . ? 
C1 H1C 0.9800 . ? 
C1 H1D 0.9800 . ? 
C2 H2A 0.9800 . ? 
C2 H2B 0.9800 . ? 
C2 H2C 0.9800 . ? 
C3 H3A 0.9800 . ? 
C3 H3B 0.9800 . ? 
C3 H3C 0.9800 . ? 
P2 C6 1.793(8) . ? 
P2 C4 1.813(8) . ? 
P2 C5 1.834(8) . ? 
C4 H4A 0.9800 . ? 
C4 H4B 0.9800 . ? 
C4 H4C 0.9800 . ? 
C5 H5A 0.9800 . ? 
C5 H5B 0.9800 . ? 
C5 H5C 0.9800 . ? 
C6 H6A 0.9800 . ? 
C6 H6B 0.9800 . ? 
C6 H6C 0.9800 . ? 
P3 C9 1.800(8) . ? 
P3 C8 1.810(8) . ? 
P3 C7 1.820(9) . ? 
C7 H7A 0.9800 . ? 
C7 H7B 0.9800 . ? 
C7 H7C 0.9800 . ? 
C8 H8A 0.9800 . ? 
C8 H8B 0.9800 . ? 
C8 H8C 0.9800 . ? 
C9 H9A 0.9800 . ? 
C9 H9B 0.9800 . ? 
C9 H9C 0.9800 . ? 
P1A C1A 1.735(7) . ? 
P1A C3A 1.768(9) . ? 
P1A C1B 1.806(8) . ? 
P1A C2A 1.808(9) . ? 
C1A H1A1 0.9900 . ? 
C1A H1A2 0.9900 . ? 
C2A H2A1 0.9800 . ? 
C2A H2A2 0.9800 . ? 
C2A H2A3 0.9800 . ? 
C3A H3A1 0.9800 . ? 
C3A H3A2 0.9800 . ? 
C3A H3A3 0.9800 . ? 
C1B S1B 1.786(8) . ? 
C1B S2B 1.809(8) . ? 
C1B H1B 1.0000 . ? 
S2B C1C 1.741(8) . ? 
C1C S1C 1.647(8) . ? 
C1C S2C 1.683(8) . ? 
 
loop_ 
 _geom_angle_atom_site_label_1 
 _geom_angle_atom_site_label_2 
 _geom_angle_atom_site_label_3 
 _geom_angle 
 _geom_angle_site_symmetry_1 
 _geom_angle_site_symmetry_3 
 _geom_angle_publ_flag 
C1A Ru1 P1 93.6(2) . . ? 
C1A Ru1 P2 87.2(2) . . ? 
P1 Ru1 P2 93.79(7) . . ? 
C1A Ru1 P3 170.9(2) . . ? 
P1 Ru1 P3 94.77(8) . . ? 
P2 Ru1 P3 95.96(7) . . ? 
C1A Ru1 S1B 84.6(2) . . ? 
P1 Ru1 S1B 85.21(7) . . ? 
P2 Ru1 S1B 171.68(8) . . ? 
P3 Ru1 S1B 92.35(7) . . ? 
C1A Ru1 S1C 85.3(2) . . ? 
P1 Ru1 S1C 178.12(8) . . ? 
P2 Ru1 S1C 87.67(7) . . ? 
P3 Ru1 S1C 86.25(8) . . ? 
S1B Ru1 S1C 93.17(7) . . ? 
C3 P1 C2 98.9(4) . . ? 
C3 P1 C1 99.0(4) . . ? 
C2 P1 C1 98.8(4) . . ? 
C3 P1 Ru1 123.0(3) . . ? 
C2 P1 Ru1 116.8(3) . . ? 
C1 P1 Ru1 116.1(3) . . ? 
P1 C1 H1A 109.5 . . ? 
P1 C1 H1C 109.5 . . ? 
H1A C1 H1C 109.5 . . ? 
P1 C1 H1D 109.5 . . ? 
H1A C1 H1D 109.5 . . ? 
H1C C1 H1D 109.5 . . ? 
P1 C2 H2A 109.5 . . ? 
P1 C2 H2B 109.5 . . ? 
H2A C2 H2B 109.5 . . ? 
P1 C2 H2C 109.5 . . ? 
H2A C2 H2C 109.5 . . ? 
H2B C2 H2C 109.5 . . ? 
P1 C3 H3A 109.5 . . ? 
P1 C3 H3B 109.5 . . ? 
H3A C3 H3B 109.5 . . ? 
P1 C3 H3C 109.5 . . ? 
H3A C3 H3C 109.5 . . ? 
H3B C3 H3C 109.5 . . ? 
C6 P2 C4 99.4(4) . . ? 
C6 P2 C5 98.6(4) . . ? 
C4 P2 C5 99.8(4) . . ? 
C6 P2 Ru1 117.0(3) . . ? 
C4 P2 Ru1 115.0(3) . . ? 
C5 P2 Ru1 123.0(3) . . ? 
P2 C4 H4A 109.5 . . ? 
P2 C4 H4B 109.5 . . ? 
H4A C4 H4B 109.5 . . ? 
P2 C4 H4C 109.5 . . ? 
H4A C4 H4C 109.5 . . ? 
H4B C4 H4C 109.5 . . ? 
P2 C5 H5A 109.5 . . ? 
P2 C5 H5B 109.5 . . ? 
H5A C5 H5B 109.5 . . ? 
P2 C5 H5C 109.5 . . ? 
H5A C5 H5C 109.5 . . ? 
H5B C5 H5C 109.5 . . ? 
P2 C6 H6A 109.5 . . ? 
P2 C6 H6B 109.5 . . ? 
H6A C6 H6B 109.5 . . ? 
P2 C6 H6C 109.5 . . ? 
H6A C6 H6C 109.5 . . ? 
H6B C6 H6C 109.5 . . ? 
C9 P3 C8 100.0(5) . . ? 
C9 P3 C7 98.8(5) . . ? 
C8 P3 C7 98.5(5) . . ? 
C9 P3 Ru1 115.5(3) . . ? 
C8 P3 Ru1 117.5(3) . . ? 
C7 P3 Ru1 122.4(3) . . ? 
P3 C7 H7A 109.5 . . ? 
P3 C7 H7B 109.5 . . ? 
H7A C7 H7B 109.5 . . ? 
P3 C7 H7C 109.5 . . ? 
H7A C7 H7C 109.5 . . ? 
H7B C7 H7C 109.5 . . ? 
P3 C8 H8A 109.5 . . ? 
P3 C8 H8B 109.5 . . ? 
H8A C8 H8B 109.5 . . ? 
P3 C8 H8C 109.5 . . ? 
H8A C8 H8C 109.5 . . ? 
H8B C8 H8C 109.5 . . ? 
P3 C9 H9A 109.5 . . ? 
P3 C9 H9B 109.5 . . ? 
H9A C9 H9B 109.5 . . ? 
P3 C9 H9C 109.5 . . ? 
H9A C9 H9C 109.5 . . ? 
H9B C9 H9C 109.5 . . ? 
C1A P1A C3A 112.0(4) . . ? 
C1A P1A C1B 111.7(4) . . ? 
C3A P1A C1B 111.2(4) . . ? 
C1A P1A C2A 112.7(4) . . ? 
C3A P1A C2A 106.3(5) . . ? 
C1B P1A C2A 102.4(4) . . ? 
P1A C1A Ru1 112.6(4) . . ? 
P1A C1A H1A1 109.1 . . ? 
Ru1 C1A H1A1 109.1 . . ? 
P1A C1A H1A2 109.1 . . ? 
Ru1 C1A H1A2 109.1 . . ? 
H1A1 C1A H1A2 107.8 . . ? 
P1A C2A H2A1 109.5 . . ? 
P1A C2A H2A2 109.5 . . ? 
H2A1 C2A H2A2 109.5 . . ? 
P1A C2A H2A3 109.5 . . ? 
H2A1 C2A H2A3 109.5 . . ? 
H2A2 C2A H2A3 109.5 . . ? 
P1A C3A H3A1 109.5 . . ? 
P1A C3A H3A2 109.5 . . ? 
H3A1 C3A H3A2 109.5 . . ? 
P1A C3A H3A3 109.5 . . ? 
H3A1 C3A H3A3 109.5 . . ? 
H3A2 C3A H3A3 109.5 . . ? 
S1B C1B P1A 105.8(4) . . ? 
S1B C1B S2B 117.2(4) . . ? 
P1A C1B S2B 117.4(4) . . ? 
S1B C1B H1B 105.0 . . ? 
P1A C1B H1B 105.0 . . ? 
S2B C1B H1B 105.0 . . ? 
C1B S1B Ru1 101.7(3) . . ? 
C1C S2B C1B 109.2(4) . . ? 
S1C C1C S2C 123.1(5) . . ? 
S1C C1C S2B 127.2(5) . . ? 
S2C C1C S2B 109.7(4) . . ? 
C1C S1C Ru1 123.6(3) . . ? 
 
loop_ 
 _geom_torsion_atom_site_label_1 
 _geom_torsion_atom_site_label_2 
 _geom_torsion_atom_site_label_3 
 _geom_torsion_atom_site_label_4 
 _geom_torsion 
 _geom_torsion_site_symmetry_1 
 _geom_torsion_site_symmetry_2 
 _geom_torsion_site_symmetry_3 
 _geom_torsion_site_symmetry_4 
 _geom_torsion_publ_flag 
C1A Ru1 P1 C3 -118.0(4) . . . . ? 
P2 Ru1 P1 C3 -30.6(4) . . . . ? 
P3 Ru1 P1 C3 65.7(4) . . . . ? 
S1B Ru1 P1 C3 157.7(4) . . . . ? 
S1C Ru1 P1 C3 -172(2) . . . . ? 
C1A Ru1 P1 C2 4.3(4) . . . . ? 
P2 Ru1 P1 C2 91.7(3) . . . . ? 
P3 Ru1 P1 C2 -172.0(3) . . . . ? 
S1B Ru1 P1 C2 -80.0(3) . . . . ? 
S1C Ru1 P1 C2 -49(3) . . . . ? 
C1A Ru1 P1 C1 120.2(4) . . . . ? 
P2 Ru1 P1 C1 -152.4(3) . . . . ? 
P3 Ru1 P1 C1 -56.0(3) . . . . ? 
S1B Ru1 P1 C1 35.9(3) . . . . ? 
S1C Ru1 P1 C1 67(2) . . . . ? 
C1A Ru1 P2 C6 -77.4(4) . . . . ? 
P1 Ru1 P2 C6 -170.8(4) . . . . ? 
P3 Ru1 P2 C6 94.0(4) . . . . ? 
S1B Ru1 P2 C6 -88.0(6) . . . . ? 
S1C Ru1 P2 C6 8.0(4) . . . . ? 
C1A Ru1 P2 C4 38.7(4) . . . . ? 
P1 Ru1 P2 C4 -54.7(3) . . . . ? 
P3 Ru1 P2 C4 -149.9(3) . . . . ? 
S1B Ru1 P2 C4 28.1(6) . . . . ? 
S1C Ru1 P2 C4 124.1(3) . . . . ? 
C1A Ru1 P2 C5 160.5(4) . . . . ? 
P1 Ru1 P2 C5 67.1(4) . . . . ? 
P3 Ru1 P2 C5 -28.1(4) . . . . ? 
S1B Ru1 P2 C5 149.9(6) . . . . ? 
S1C Ru1 P2 C5 -114.0(4) . . . . ? 
C1A Ru1 P3 C9 -60.6(14) . . . . ? 
P1 Ru1 P3 C9 95.1(4) . . . . ? 
P2 Ru1 P3 C9 -170.6(4) . . . . ? 
S1B Ru1 P3 C9 9.7(4) . . . . ? 
S1C Ru1 P3 C9 -83.3(4) . . . . ? 
C1A Ru1 P3 C8 57.1(14) . . . . ? 
P1 Ru1 P3 C8 -147.2(4) . . . . ? 
P2 Ru1 P3 C8 -52.9(4) . . . . ? 
S1B Ru1 P3 C8 127.4(4) . . . . ? 
S1C Ru1 P3 C8 34.4(4) . . . . ? 
C1A Ru1 P3 C7 179.0(14) . . . . ? 
P1 Ru1 P3 C7 -25.3(4) . . . . ? 
P2 Ru1 P3 C7 69.1(4) . . . . ? 
S1B Ru1 P3 C7 -110.6(4) . . . . ? 
S1C Ru1 P3 C7 156.3(4) . . . . ? 
C3A P1A C1A Ru1 -127.2(5) . . . . ? 
C1B P1A C1A Ru1 -1.6(5) . . . . ? 
C2A P1A C1A Ru1 113.0(5) . . . . ? 
P1 Ru1 C1A P1A -107.3(4) . . . . ? 
P2 Ru1 C1A P1A 159.1(4) . . . . ? 
P3 Ru1 C1A P1A 48.4(16) . . . . ? 
S1B Ru1 C1A P1A -22.5(4) . . . . ? 
S1C Ru1 C1A P1A 71.2(4) . . . . ? 
C1A P1A C1B S1B 35.2(5) . . . . ? 
C3A P1A C1B S1B 161.3(4) . . . . ? 
C2A P1A C1B S1B -85.6(5) . . . . ? 
C1A P1A C1B S2B -97.7(5) . . . . ? 
C3A P1A C1B S2B 28.3(6) . . . . ? 
C2A P1A C1B S2B 141.5(5) . . . . ? 
P1A C1B S1B Ru1 -48.7(4) . . . . ? 
S2B C1B S1B Ru1 84.3(4) . . . . ? 
C1A Ru1 S1B C1B 40.6(3) . . . . ? 
P1 Ru1 S1B C1B 134.7(3) . . . . ? 
P2 Ru1 S1B C1B 51.2(6) . . . . ? 
P3 Ru1 S1B C1B -130.7(3) . . . . ? 
S1C Ru1 S1B C1B -44.4(3) . . . . ? 
S1B C1B S2B C1C -63.8(5) . . . . ? 
P1A C1B S2B C1C 63.9(5) . . . . ? 
C1B S2B C1C S1C 5.0(7) . . . . ? 
C1B S2B C1C S2C -174.6(4) . . . . ? 
S2C C1C S1C Ru1 -164.2(4) . . . . ? 
S2B C1C S1C Ru1 16.2(8) . . . . ? 
C1A Ru1 S1C C1C -78.9(4) . . . . ? 
P1 Ru1 S1C C1C -25(3) . . . . ? 
P2 Ru1 S1C C1C -166.3(4) . . . . ? 
P3 Ru1 S1C C1C 97.5(4) . . . . ? 
S1B Ru1 S1C C1C 5.4(4) . . . . ? 
 
_diffrn_measured_fraction_theta_max    0.982 
_diffrn_reflns_theta_full              25.00 
_diffrn_measured_fraction_theta_full   0.982 
_refine_diff_density_max    1.144 
_refine_diff_density_min   -0.755 
_refine_diff_density_rms    0.144 
_iucr_refine_instructions_details
;
TITL Peter3_0m in P2(1)/c
CELL 0.71073  11.7439   8.9459  22.8664  90.000  94.403  90.000
ZERR    4.00   0.0041   0.0030   0.0084   0.000   0.018   0.000
LATT 1
SYMM -X, 0.5+Y, 0.5-Z
SFAC C  H  P  S  Ru 
UNIT 56  144  16  16  4  
OMIT 1 0 0
OMIT 0 0 2
OMIT -1 1 2
OMIT -3 50
L.S. 15
ACTA 
BOND $H
FMAP 2
PLAN 20
CONF
SIZE 0.108 0.053 0.035
WGHT   0.045400   9.905900 
FVAR 0.107510 
TEMP -123.160
Ru1    5   0.245035   0.354765   0.132243  11.000000   0.017280 = 
           0.014430   0.023680  -0.000160   0.002900   0.000180
P1     3   0.053660   0.319783   0.133581  11.000000   0.019160 = 
           0.022900   0.027170   0.000400   0.003150  -0.000020
C1     1   0.008575   0.139174   0.160468  11.000000   0.031400 = 
           0.035910   0.057250   0.006090   0.012970  -0.005050
AFIX 137
H1A    2  -0.074956   0.136237   0.159597  11.000000  -1.500000
H1C    2   0.041149   0.124578   0.200816  11.000000  -1.500000
H1D    2   0.035279   0.059552   0.135455  11.000000  -1.500000
AFIX 0
C2     1  -0.029454   0.320447   0.062968  11.000000   0.026400 = 
           0.062950   0.031280   0.002620  -0.000480  -0.003800
AFIX 137
H2A    2  -0.108379   0.291369   0.068456  11.000000  -1.500000
H2B    2   0.003866   0.249368   0.036490  11.000000  -1.500000
H2C    2  -0.028565   0.420960   0.045966  11.000000  -1.500000
AFIX 0
C3     1  -0.037085   0.440355   0.174142  11.000000   0.018890 = 
           0.043630   0.057700  -0.006150   0.010450  -0.001940
AFIX 137
H3A    2  -0.039897   0.540255   0.156503  11.000000  -1.500000
H3B    2  -0.005881   0.447298   0.215047  11.000000  -1.500000
H3C    2  -0.114349   0.398449   0.172720  11.000000  -1.500000
AFIX 0
P2     3   0.233009   0.608295   0.142678  11.000000   0.022190 = 
           0.016800   0.037390  -0.001710   0.001810   0.000480
C4     1   0.136544   0.700958   0.088563  11.000000   0.047120 = 
           0.020510   0.060520   0.001880  -0.007110   0.005820
AFIX 137
H4A    2   0.139038   0.809101   0.095380  11.000000  -1.500000
H4B    2   0.058620   0.664457   0.091866  11.000000  -1.500000
H4C    2   0.159827   0.679405   0.049188  11.000000  -1.500000
AFIX 0
C5     1   0.189690   0.698015   0.209568  11.000000   0.052440 = 
           0.029980   0.057800  -0.009990   0.011700   0.005070
AFIX 137
H5A    2   0.246048   0.675830   0.242262  11.000000  -1.500000
H5B    2   0.114818   0.659771   0.218572  11.000000  -1.500000
H5C    2   0.185051   0.806396   0.203619  11.000000  -1.500000
AFIX 0
C6     1   0.360085   0.714365   0.133823  11.000000   0.037620 = 
           0.017080   0.098380  -0.005410   0.009980  -0.005250
AFIX 137
H6A    2   0.385388   0.697024   0.094536  11.000000  -1.500000
H6B    2   0.420245   0.683093   0.163362  11.000000  -1.500000
H6C    2   0.344076   0.820954   0.138730  11.000000  -1.500000
AFIX 0
P3     3   0.284562   0.303271   0.231473  11.000000   0.026900 = 
           0.026550   0.030180  -0.000270  -0.002380   0.003000
C7     1   0.179208   0.328586   0.284988  11.000000   0.055080 = 
           0.082660   0.022620  -0.006170   0.003840   0.017170
AFIX 137
H7A    2   0.210626   0.292782   0.323399  11.000000  -1.500000
H7B    2   0.110145   0.271723   0.272717  11.000000  -1.500000
H7C    2   0.160121   0.434886   0.287666  11.000000  -1.500000
AFIX 0
C8     1   0.402337   0.402234   0.269684  11.000000   0.047540 = 
           0.067040   0.044050   0.002290  -0.025710  -0.013400
AFIX 137
H8A    2   0.409188   0.371960   0.310993  11.000000  -1.500000
H8B    2   0.388351   0.510104   0.267005  11.000000  -1.500000
H8C    2   0.473253   0.378232   0.251747  11.000000  -1.500000
AFIX 0
C9     1   0.325556   0.113504   0.248786  11.000000   0.069910 = 
           0.038040   0.049200   0.006660  -0.006350   0.015140
AFIX 137
H9A    2   0.388009   0.083809   0.225190  11.000000  -1.500000
H9B    2   0.260013   0.047208   0.240070  11.000000  -1.500000
H9C    2   0.350962   0.106196   0.290523  11.000000  -1.500000
AFIX 0
P1A    3   0.289543   0.243851  -0.001174  11.000000   0.030730 = 
           0.036800   0.027320  -0.000840   0.007940   0.003880
C1A    1   0.235965   0.392861   0.036773  11.000000   0.027800 = 
           0.033430   0.026970   0.001340   0.008660   0.005720
AFIX 23
H1A1   2   0.155393   0.410062   0.022332  11.000000  -1.200000
H1A2   2   0.279739   0.484144   0.028668  11.000000  -1.200000
AFIX 0
C2A    1   0.180372   0.148412  -0.047108  11.000000   0.053620 = 
           0.065750   0.043000  -0.020410  -0.007280   0.001370
AFIX 137
H2A1   2   0.123812   0.105595  -0.022555  11.000000  -1.500000
H2A2   2   0.215371   0.068286  -0.068813  11.000000  -1.500000
H2A3   2   0.142763   0.219627  -0.074852  11.000000  -1.500000
AFIX 0
C3A    1   0.394268   0.301334  -0.048011  11.000000   0.064250 = 
           0.054520   0.059470   0.002140   0.034390  -0.001660
AFIX 137
H3A1   2   0.363488   0.382019  -0.073555  11.000000  -1.500000
H3A2   2   0.415460   0.216574  -0.072064  11.000000  -1.500000
H3A3   2   0.461900   0.337270  -0.024375  11.000000  -1.500000
AFIX 0
C1B    1   0.342972   0.097122   0.047782  11.000000   0.030000 = 
           0.023680   0.035960  -0.009060   0.002440   0.001570
AFIX 13
H1B    2   0.326194   0.002117   0.025737  11.000000  -1.200000
AFIX 0
S1B    4   0.250793   0.094498   0.106371  11.000000   0.039480 = 
           0.016800   0.038230  -0.001640   0.012730   0.000280
S2B    4   0.495108   0.092694   0.067503  11.000000   0.029450 = 
           0.045640   0.057880  -0.018840   0.000540   0.013680
C1C    1   0.534570   0.254050   0.106567  11.000000   0.020180 = 
           0.034850   0.044580  -0.002840   0.004100   0.004520
S1C    4   0.449554   0.385860   0.128337  11.000000   0.021250 = 
           0.025860   0.059350  -0.008400   0.008160  -0.001260
S2C    4   0.677522   0.259365   0.119619  11.000000   0.018450 = 
           0.082370   0.094140  -0.023960   0.003340   0.005620
HKLF 4
END 
HKLF 4
REM  Peter3_0m in P2(1)/c
REM R1=  0.0527 for   2989 Fo > 4sig(Fo)  and  0.0861 for all   4149 data
REM    219 parameters refined using      0 restraints
;
